# Supplementary material for: Quantitative analysis of hydrogen and chalcogen bonds in two pyrimidine-5-carbonitrile derivatives, potential DHFR inhibitors: an integrated crystallographic and theoretical study
Source: PubMed Central journal article supplement — RSC Adv. 2020 Oct 6;10(60):36806–17. doi: 10.1039/d0ra07215j (PMC9057057; doi:10.1039/d0ra07215j), 2020-10-06
Supplement: RA-010-D0RA07215J-s001.pdf [file RA-010-D0RA07215J-s001.pdf]

Supporting information

## **Quantitative analysis of hydrogen and chalcogen bonds in two pyrimidine derivatives, potential DHFR inhibitors: an integrated crystallographic and theoretical study**

**Lamya H. Al-Wahaibi,<sup>a</sup> Kushumita Chakraborty,<sup>b</sup> Nora H. Al-Shaalan,<sup>a</sup> Mohamed Yehya Annavi Syed Majeed,<sup>b</sup> Olivier Blacque,<sup>c</sup> Aamal A. Al-Mutairi,<sup>d</sup> Ali A. El-Emam,<sup>e</sup> M. Judith Percino<sup>f</sup> and Subbiah Thamocharan<sup>b\*</sup>**

<sup>a</sup> *Department of Chemistry, College of Sciences, Princess Nourah bint Abdulrahman University, Riyadh 11671, Saudi Arabia*

<sup>b</sup> *Biomolecular Crystallography Laboratory, Department of Bioinformatics, School of Chemical and Biotechnology, SASTRA Deemed University, Thanjavur-613 401, India*

<sup>c</sup> *Department of Chemistry, University of Zurich, Winterthurerstrasse 190, 8057 Zurich, Switzerland*

<sup>d</sup> *Department of Chemistry, College of Sciences, Imam Mohammad Ibn Saud Islamic University (IMSIU), Riyadh 11623, Saudi Arabia*

<sup>e</sup> *Department of Medicinal Chemistry, Faculty of Pharmacy, Mansoura University, Mansoura 35516, Egypt*

<sup>f</sup> *Unidad de Polímeros y Electrónica Orgánica, Instituto de Ciencias, Benemérita Universidad Autónoma de Puebla, Val3-Ecocampus Valsequillo, Independencia O2 Sur 50, San Pedro Zacachimalpa, Puebla-C.P.72960, México.*

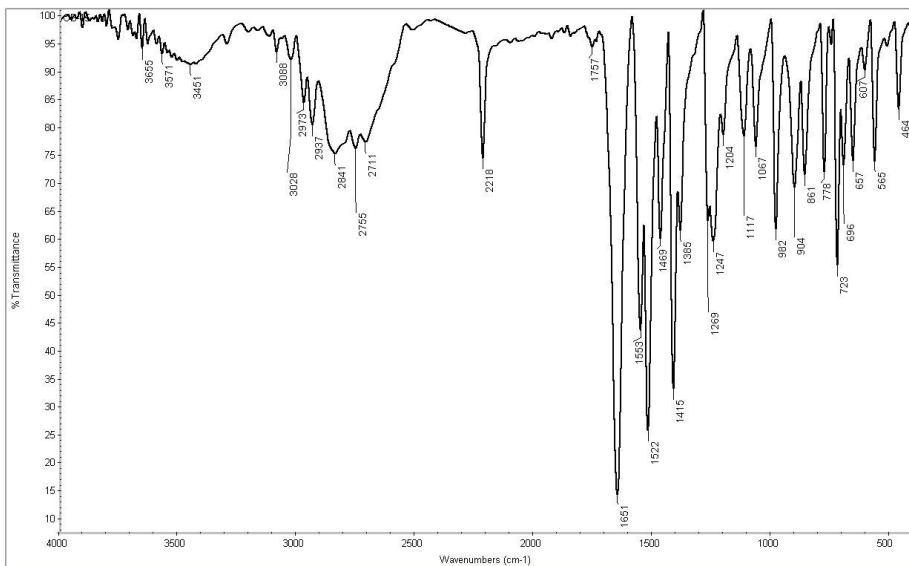

FT-IR spectrum for compound 1.

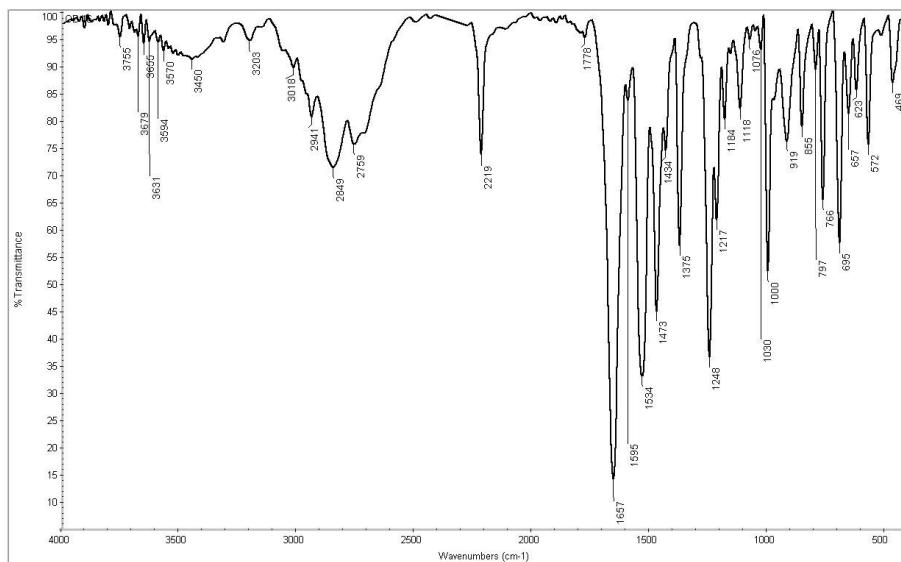

FT-IR spectrum for compound 2.

Table S1. Topological parameters for intramolecular interactions in X-ray and optimized structures of **1** and **2** [ $\rho(r)$ : electron density ( $e/\text{\AA}^3$ ),  $\nabla^2\rho(r)$ : Laplacian of electron density ( $e/\text{\AA}^5$ );  $V(r)$ : potential energy density,  $G(r)$ : kinetic energy density;  $H(r)$ : total energy density;  $R_{ij}$ : bond path ( $\text{\AA}$ ),  $De = -0.5 \times V(r)$  in  $\text{kcal mol}^{-1}$  and the values of  $V(r)$ ,  $G(r)$  and  $H(r)$  are expressed in  $\text{kJ mol}^{-1} \text{bohr}^{-3}$ ]

| Interaction                                  | $R_{ij}$ | $\rho(r)$ | $\nabla^2\rho(r)$ | $V(r)$ | $G(r)$ | $H(r)$ | $\frac{-V(r)}{ G(r) }$ | $D_e$ |
|----------------------------------------------|----------|-----------|-------------------|--------|--------|--------|------------------------|-------|
| <b>1 (X-ray)</b>                             |          |           |                   |        |        |        |                        |       |
| C11–H11 $\cdots$ C9                          | 2.720    | 0.086     | 1.081             | -20.3  | 24.9   | 4.6    | 0.82                   | 2.4   |
| <b>1 (optimized)</b>                         |          |           |                   |        |        |        |                        |       |
| C11–H11 $\cdots$ N2                          | 3.009    | 0.093     | 1.189             | -22.2  | 27.3   | 5.1    | 0.81                   | 2.7   |
| <b>2 (X-ray, major disordered component)</b> |          |           |                   |        |        |        |                        |       |
| C11A–H111 $\cdots$ C9                        | 2.426    | 0.107     | 1.310             | -27.9  | 31.8   | 3.9    | 0.88                   | 3.3   |
| <b>2 (X-ray, minor disordered component)</b> |          |           |                   |        |        |        |                        |       |
| C11B–H112 $\cdots$ C9                        | 2.390    | 0.110     | 1.341             | -28.8  | 32.6   | 3.9    | 0.88                   | 3.4   |
| <b>2 (optimized)</b>                         |          |           |                   |        |        |        |                        |       |
| C11A–H111 $\cdots$ C9                        | 2.650    | 0.085     | 1.070             | -21.5  | 25.3   | 3.8    | 0.85                   | 2.6   |

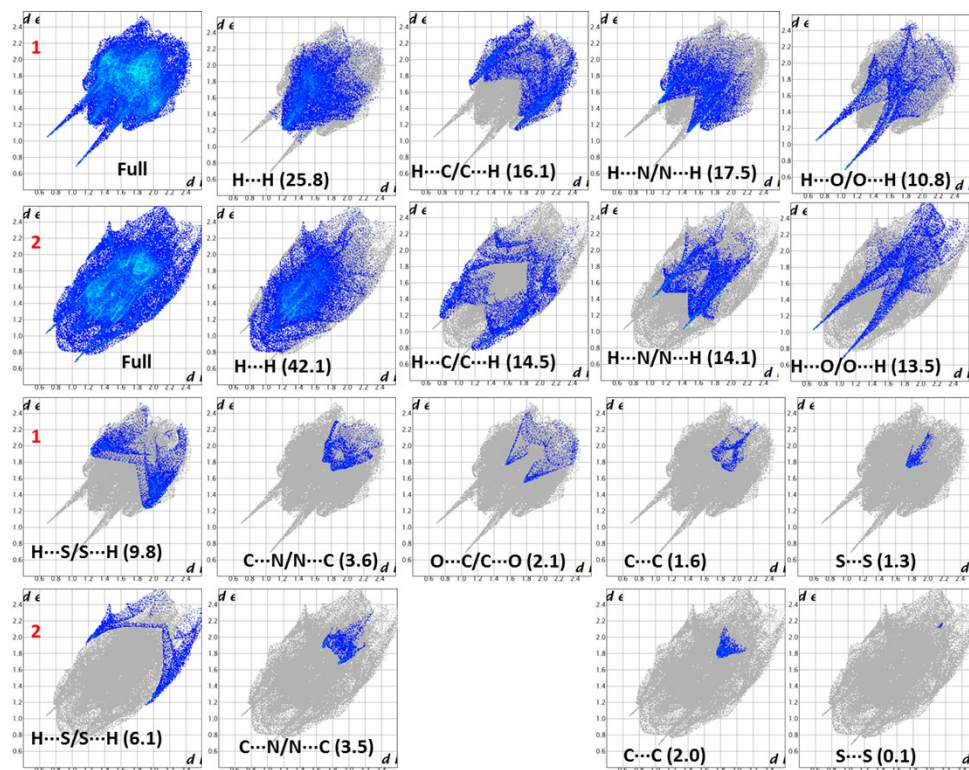

Fig. S1. 2D-fingerprint plots for various inter-contacts observed in **1** and **2**. The values in parenthesis corresponds to relative contribution to the total HS area.

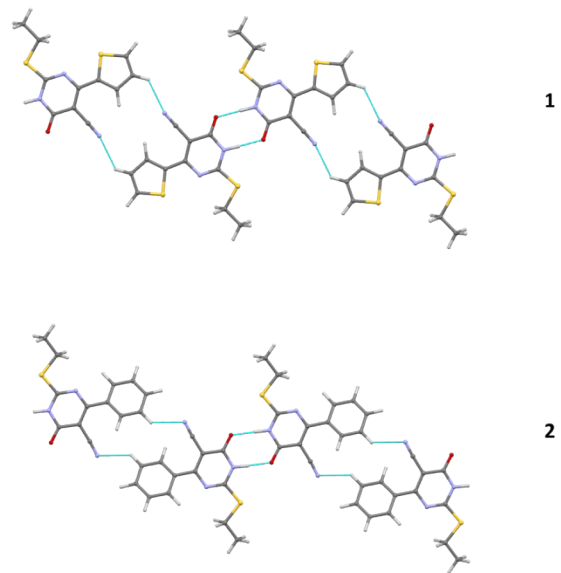

Fig. S2. 1D supramolecular construct observed in **1** and **2**.

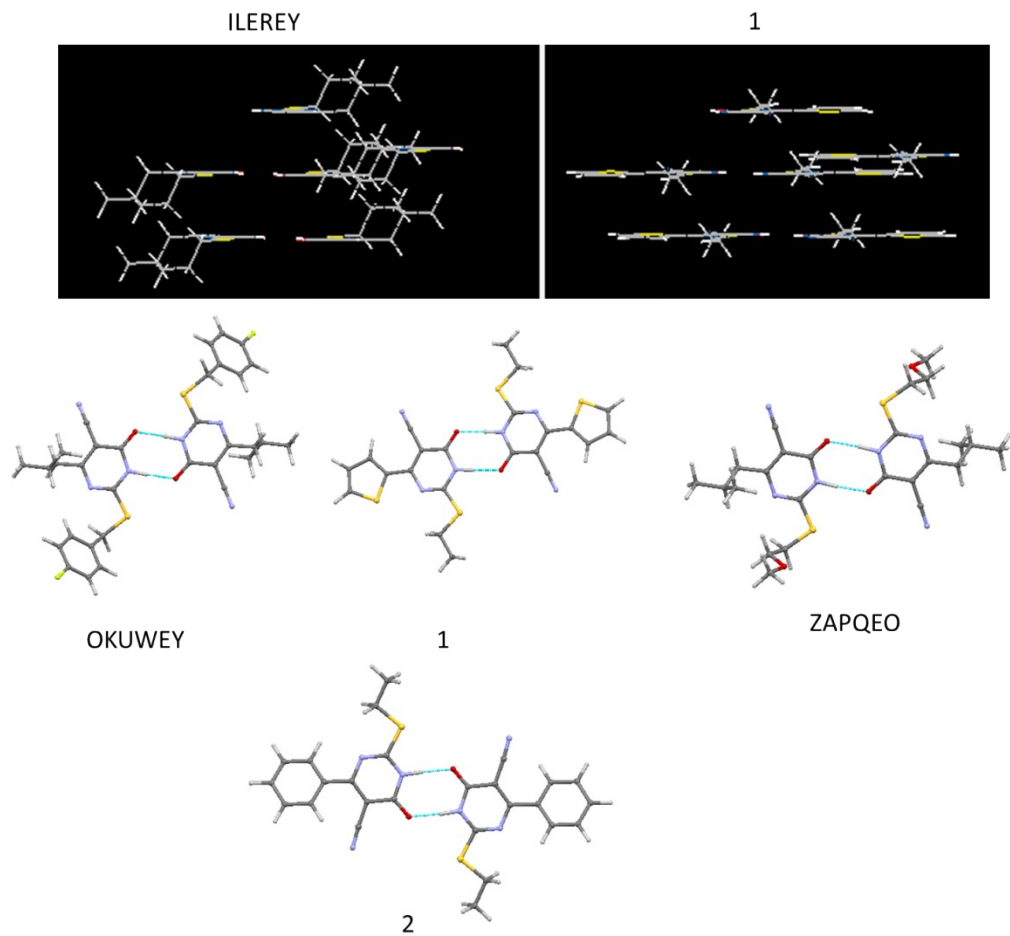

Fig. S3. Supramolecular constructs observed in **1**, **2** and their closely related structures.

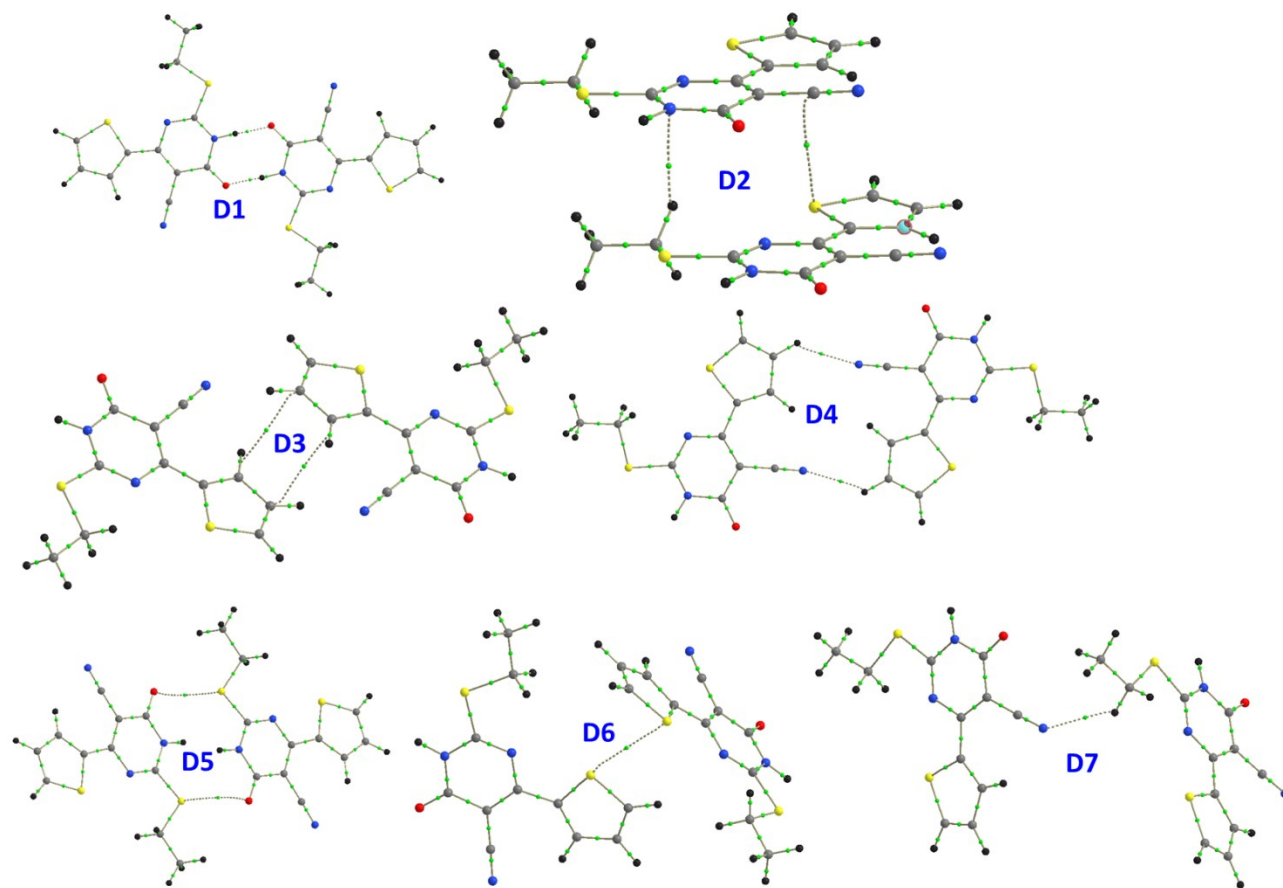

Fig. S4. Molecular graphs showing intermolecular interactions in different dimers observed in **1**.

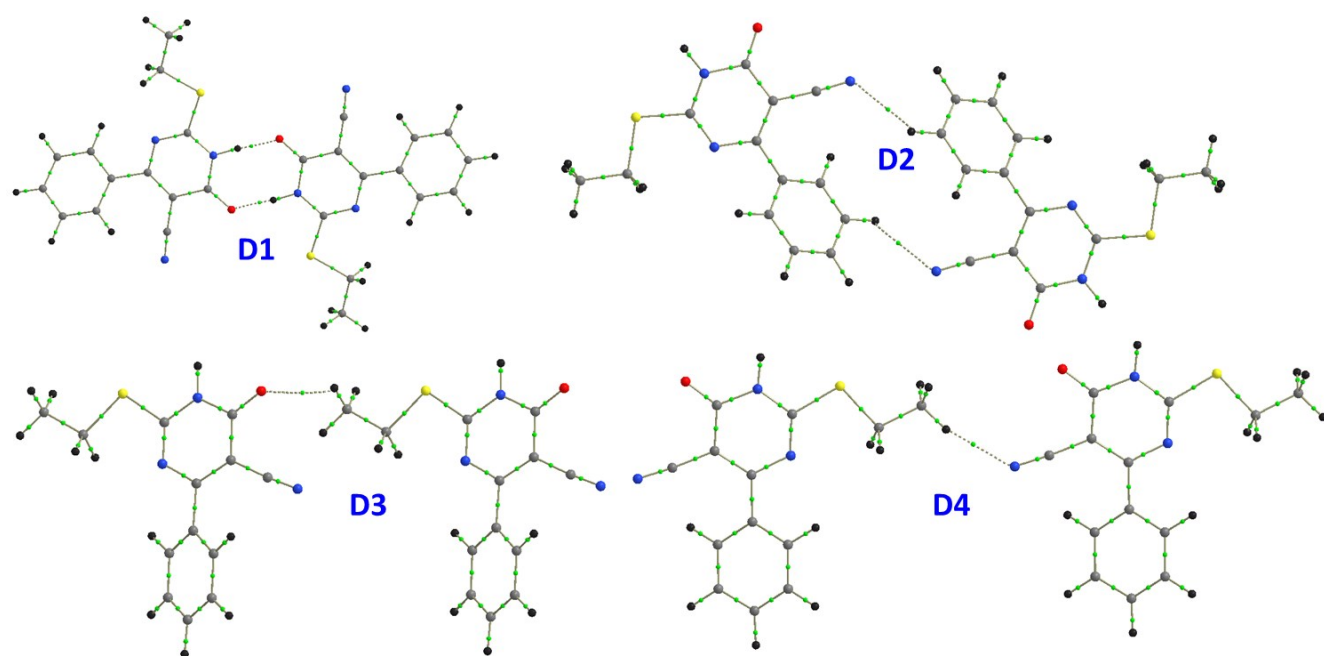

Fig. S5. Molecular graphs showing intermolecular interactions in different dimers observed in **2** (major disordered component).

## Checkcif reports

### Compound 1:

## Datablock: shelx

---

Bond precision: C-C = 0.0020 Å Wavelength=1.54184  
Cell: a=14.5546(2) b=4.9907(5) c=17.1813(3)  
alpha=90 beta=113.268(2) gamma=90  
Temperature: 160 K

|                | Calculated     | Reported       |
|----------------|----------------|----------------|
| Volume         | 1146.51(12)    | 1146.50(12)    |
| Space group    | P 21/n         | P 21/n         |
| Hall group     | -P 2yn         | -P 2yn         |
| Moiety formula | C11 H9 N3 O S2 | ?              |
| Sum formula    | C11 H9 N3 O S2 | C11 H9 N3 O S2 |
| Mr             | 263.33         | 263.33         |
| Dx, g cm-3     | 1.526          | 1.526          |
| Z              | 4              | 4              |
| Mu (mm-1)      | 4.102          | 4.102          |
| F000           | 544.0          | 544.0          |
| F000'          | 547.95         |                |
| h, k, lmax     | 18, 6, 21      | 18, 6, 21      |
| Nref           | 2336           | 2336           |
| Tmin, Tmax     | 0.726, 0.884   | 0.745, 0.908   |
| Tmin'          | 0.658          |                |

Correction method= # Reported T Limits: Tmin=0.745  
Tmax=0.908 AbsCorr = ANALYTICAL  
Data completeness= 1.000 Theta(max)= 74.466  
R(reflections)= 0.0249( 2147) wR2(reflections)= 0.0687( 2336)  
S = 1.064 Npar= 159

---

The following ALERTS were generated. Each ALERT has the format

**test-name\_ALERT\_alert-type\_alert-level.**

Click on the hyperlinks for more details of the test.

---

 **Alert level C**  
[PLAT911\\_ALERT\\_3\\_C](#) Missing FCF Refl Between Thmin & STh/L= 0.600 3 Report

---

 **Alert level G**  
[PLAT883\\_ALERT\\_1\\_G](#) No Info/Value for \_atom\_sites\_solution\_primary . Please Do !  
[PLAT933\\_ALERT\\_2\\_G](#) Number of OMIT Records in Embedded .res File ... 6 Note  
[PLAT941\\_ALERT\\_3\\_G](#) Average HKL Measurement Multiplicity ..... 4.9 Low  
[PLAT978\\_ALERT\\_2\\_G](#) Number C-C Bonds with Positive Residual Density. 9 Info  
[PLAT992\\_ALERT\\_5\\_G](#) Repd & Actual \_reflns\_number\_gt Values Differ by 3 Check

---

0 **ALERT level A** = Most likely a serious problem - resolve or explain  
0 **ALERT level B** = A potentially serious problem, consider carefully  
1 **ALERT level C** = Check. Ensure it is not caused by an omission or oversight

5 **ALERT level G** = General information/check it is not something unexpected



1 ALERT type 1 CIF construction/syntax error, inconsistent or missing data  
 2 ALERT type 2 Indicator that the structure model may be wrong or deficient  
 2 ALERT type 3 Indicator that the structure quality may be low  
 0 ALERT type 4 Improvement, methodology, query or suggestion  
 1 ALERT type 5 Informative message, check

## Compound 2:

## Datablock: shelx

---

Bond precision: C-C = 0.0019 Å Wavelength=1.54184  
 Cell: a=4.6908(2) b=9.2376(3) c=14.6613(3)  
 alpha=94.308(2) beta=93.766(2) gamma=100.924(3)  
 Temperature: 160 K

|                        | Calculated     | Reported       |
|------------------------|----------------|----------------|
| Volume                 | 619.95(4)      | 619.95(4)      |
| Space group            | P -1           | P -1           |
| Hall group             | -P 1           | -P 1           |
| Moiety formula         | C13 H11 N3 O S | ?              |
| Sum formula            | C13 H11 N3 O S | C13 H11 N3 O S |
| Mr                     | 257.31         | 257.31         |
| Dx, g cm <sup>-3</sup> | 1.378          | 1.378          |
| Z                      | 2              | 2              |
| Mu (mm <sup>-1</sup> ) | 2.248          | 2.248          |
| F000                   | 268.0          | 268.0          |
| F000'                  | 269.37         |                |
| h, k, lmax             | 5, 11, 18      | 5, 11, 18      |
| Nref                   | 2528           | 2524           |
| Tmin, Tmax             | 0.922, 0.956   | 0.848, 0.960   |
| Tmin'                  | 0.747          |                |

Correction method= # Reported T Limits: Tmin=0.848  
 Tmax=0.960 AbsCorr = ANALYTICAL  
 Data completeness= 0.998 Theta(max)= 74.464  
 R(reflections)= 0.0327( 2219) wR2(reflections)= 0.0888( 2524)  
 S = 1.024 Npar= 205

---

The following ALERTS were generated. Each ALERT has the format  
**[test-name\\_ALERT\\_alert-type\\_alert-level](#)**.  
 Click on the hyperlinks for more details of the test.

### Alert level C

[PLAT230\\_ALERT\\_2\\_C](#) Hirshfeld Test Diff for S1 --C2 . 5.3 s.u.

### Alert level G

[PLAT301\\_ALERT\\_3\\_G](#) Main Residue Disorder .....(Resd 1 ) 22%  
 Note  
[PLAT883\\_ALERT\\_1\\_G](#) No Info/Value for \_atom\_sites\_solution\_primary . Please Do !

[PLAT912\\_ALERT\\_4\\_G](#) Missing # of FCF Reflections Above STh/L= 0.600 5  
Note  
[PLAT978\\_ALERT\\_2\\_G](#) Number C-C Bonds with Positive Residual Density. 5  
Info

---

0 **ALERT level A** = Most likely a serious problem - resolve or explain  
0 **ALERT level B** = A potentially serious problem, consider carefully  
1 **ALERT level C** = Check. Ensure it is not caused by an omission or oversight  
4 **ALERT level G** = General information/check it is not something unexpected

1 ALERT type 1 CIF construction/syntax error, inconsistent or missing data  
2 ALERT type 2 Indicator that the structure model may be wrong or deficient  
1 ALERT type 3 Indicator that the structure quality may be low  
1 ALERT type 4 Improvement, methodology, query or suggestion  
0 ALERT type 5 Informative message, check

---
